# Supplementary material
Source: Springer Nature journal article supplement (https://www.springermedizin.de/resource/supplementary/13052_2009_74_MOESM2_ESM.pdf/9671334)

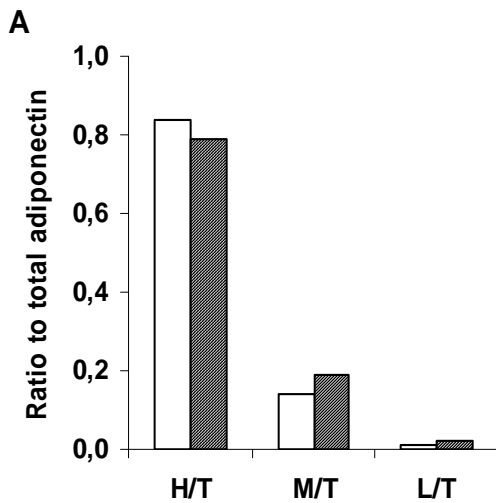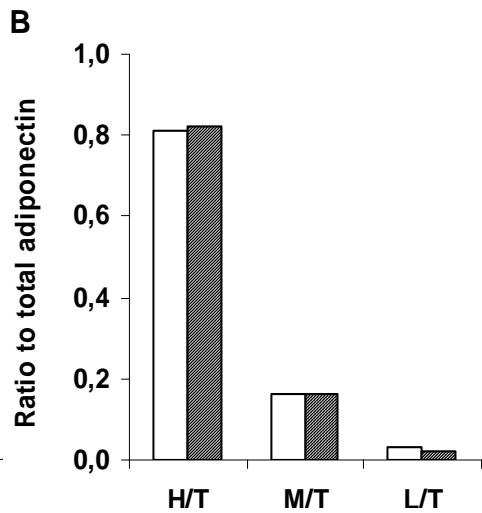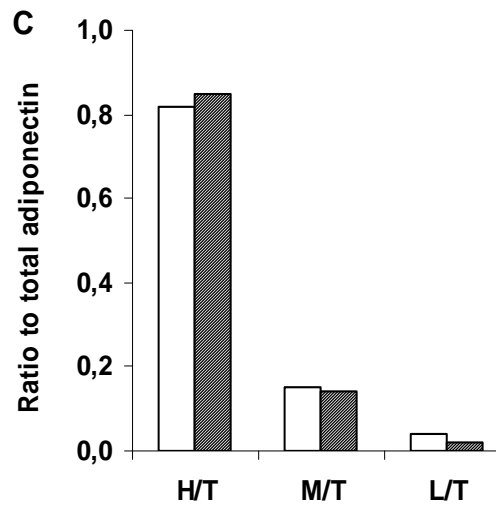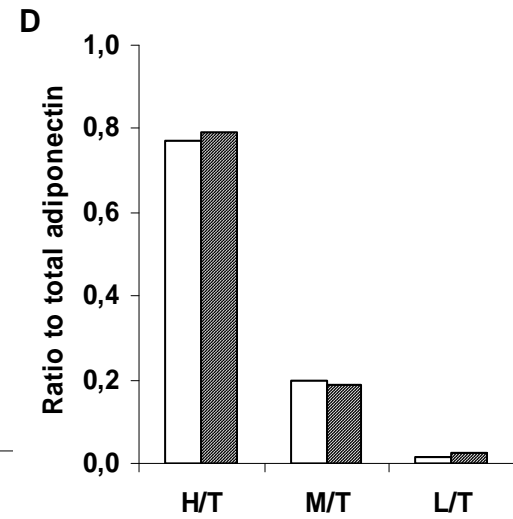

Supplement: MOESM2 [file 9671334]
